# Supplementary material
Source: PubMed Central journal article supplement (PMC9212491)

# Supplementary Figure S1

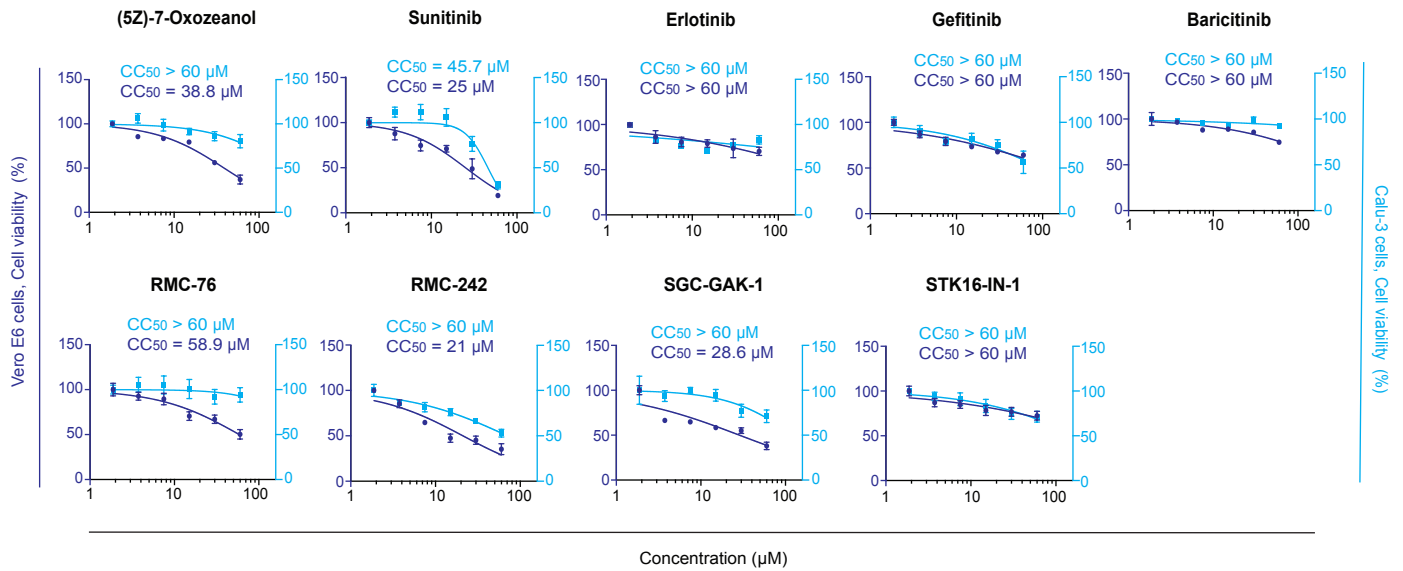

Supplementary Figure S2

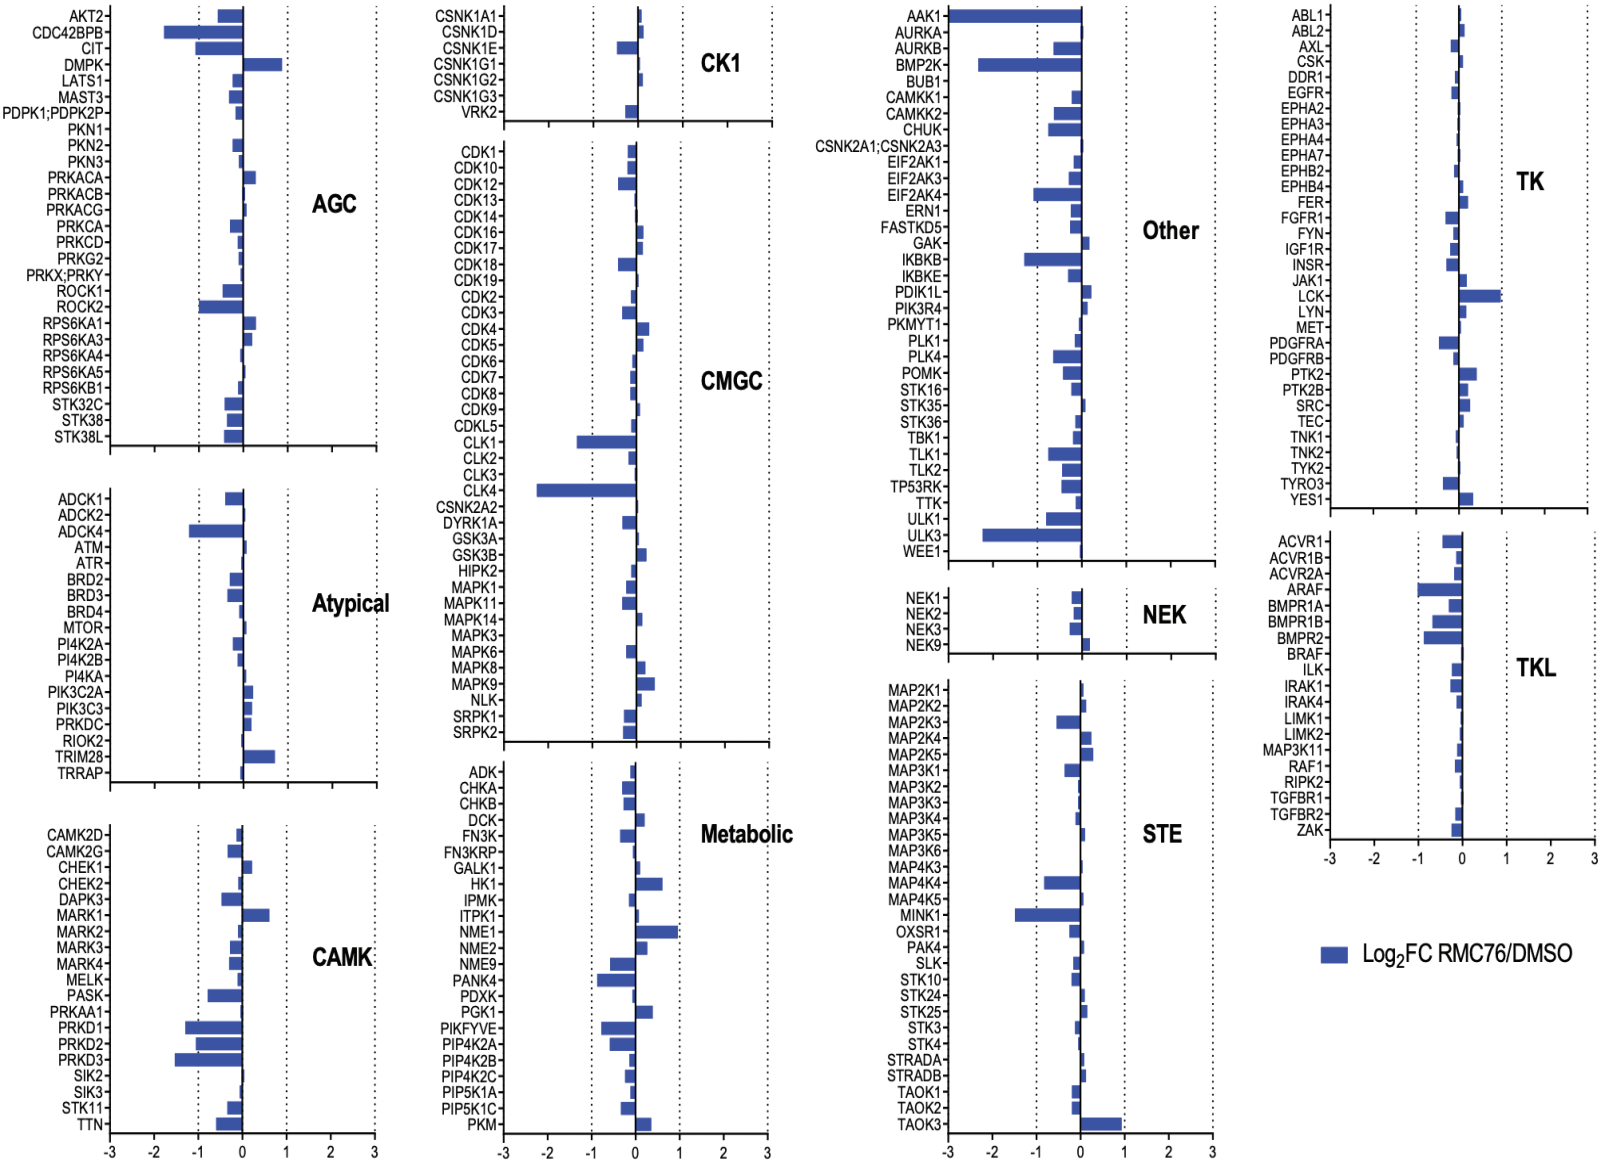

Supplement: mmc1.pdf [file mmc1.pdf]
